# Supplementary material
Source: publisher figshare collection journal article supplement (https://acs.figshare.com/ndownloader/files/4108111)
Supplement: Supplementary file 1 [file 4108111]

# Shape-Controlled Synthesis of PbS Nanocrystals via a Simple One-Step Process

**Yu Wang,<sup>†</sup> Aiwei Tang,<sup>\*,†,‡</sup> Kai Li,<sup>§</sup> Chunhe Yang,<sup>†</sup> Miao Wang,<sup>†</sup> Haihang Ye,<sup>†</sup>  
Yanbing Hou,<sup>‡</sup> and Feng Teng<sup>\*,‡</sup>**

<sup>†</sup>*Department of Chemistry, <sup>‡</sup>Key Laboratory of Luminescence and Optical Information, Ministry of Education, School of Science, Beijing JiaoTong University, Beijing 100044, P. R. China.*

<sup>§</sup>*Department of Chemistry, Capital Normal University, Beijing 100048, P. R. China.*

\* Author to whom any correspondence should be addressed. E-mail: [awtang@bjtu.edu.cn](mailto:awtang@bjtu.edu.cn),  
[fteng@bjtu.edu.cn](mailto:fteng@bjtu.edu.cn)

**Table S1.** Observed interlayer spacing ( $kd$ , nm) from the pronounced ( $0k0$ ) reflections of the as-obtained lead thiolate compound.

| $\theta$ (°) | $d$ (nm) | $k$ | $kd$ (nm) |
|--------------|----------|-----|-----------|
| 2.302        | 1.918    | 2   | 3.836     |
| 3.489        | 1.266    | 3   | 3.798     |
| 4.665        | 0.947    | 4   | 3.788     |
| 5.846        | 0.756    | 5   | 3.780     |
| 7.072        | 0.626    | 6   | 3.756     |
| 8.263        | 0.536    | 7   | 3.752     |
| 9.444        | 0.469    | 8   | 3.752     |
| 10.685       | 0.415    | 9   | 3.735     |
| 11.918       | 0.373    | 10  | 3.730     |
| 13.134       | 0.339    | 11  | 3.729     |
| 14.335       | 0.311    | 12  | 3.732     |
| 15.576       | 0.287    | 13  | 3.731     |
| 16.813       | 0.266    | 14  | 3.724     |
| 18.055       | 0.248    | 15  | 3.720     |
| 19.292       | 0.233    | 16  | 3.728     |
| 20.563       | 0.219    | 17  | 3.723     |
| 21.866       | 0.207    | 18  | 3.726     |
| 23.117       | 0.196    | 19  | 3.724     |
| 24.421       | 0.186    | 20  | 3.720     |

**Figure S1**

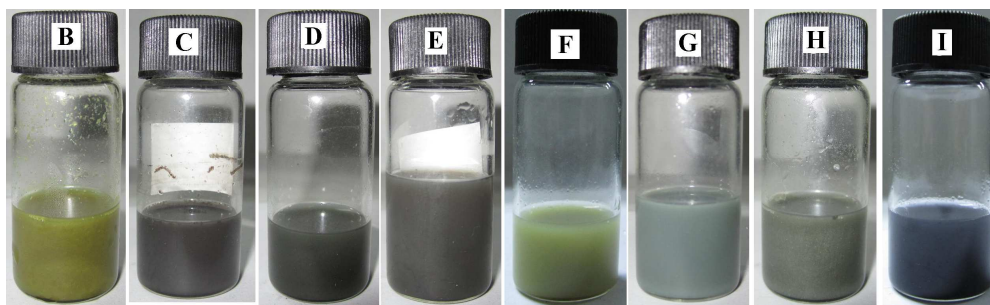

**Figure S1.** Digital photographs of PbS nanocrystals dispersed in chloroform, which were synthesized under different reaction conditions using different surfactants.

**Figure S2.**

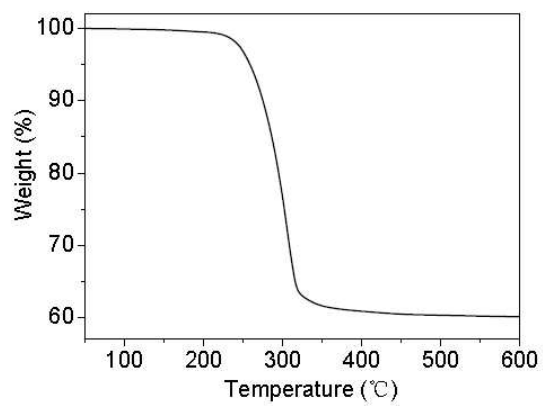

**Figure S2.** TGA curve of  $\text{Pb}_m(\text{C}_{12}\text{H}_{25})_n$  compound.

**Figure S3.**

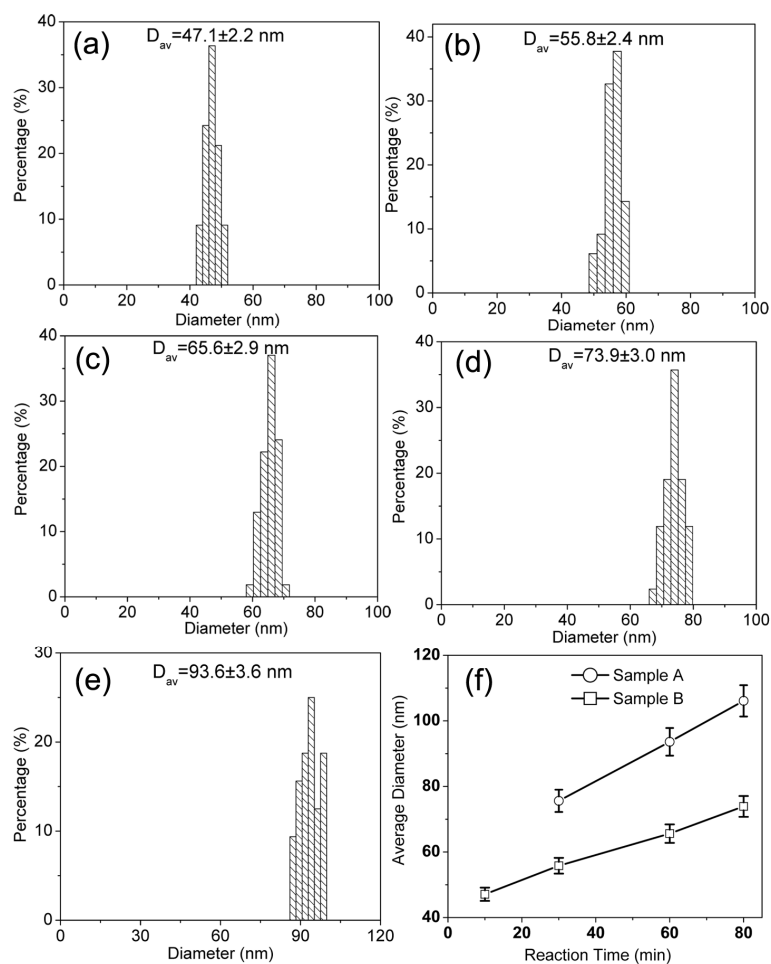

**Figure S3.** Size distribution histograms of octahedral PbS nanocrystals obtained at different reaction time and different amount of substance of Pb(OAc): (a) 10 min, Sample B; (b) 30 min, Sample B; (c) 60 min, Sample B; (d) 80 min, Sample B and (e) 60 min, Sample A and (f) the average diameter versus the reaction time of Sample A and Sample B.

**Figure S4.**

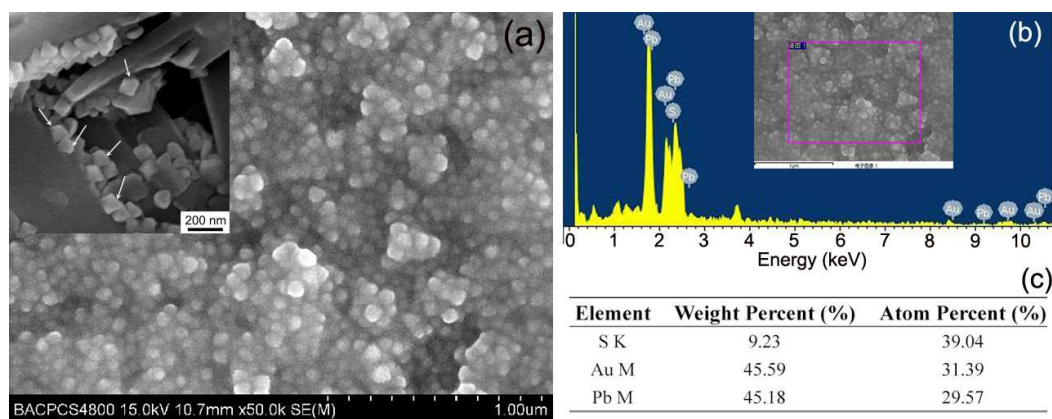

**Figure S4.** (a) SEM image of Sample B obtained at 60 min, inset shows an enlarged SEM image; (b) the corresponding EDS pattern of Sample B and (c) the element analysis of Sample B obtained from the EDS result.

**Figure S5.**

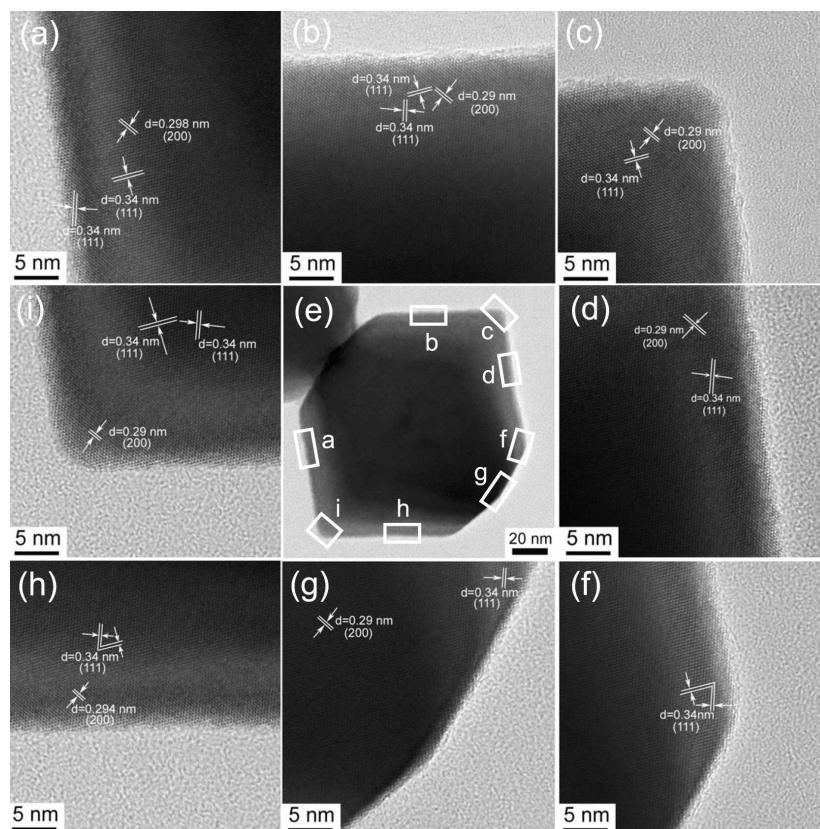

**Figure S5.** (a-d) and (f-i) are the HRTEM image of the different parts of Sample A shown in (e).

**Figure S6.**

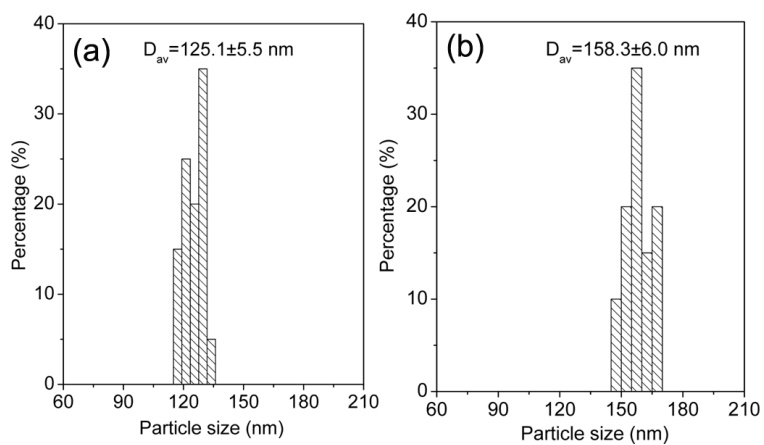

**Figure S6.** Size distribution histograms of Sample D obtained at different reaction time: (a) 10 min; (b) 60 min.

**Figure S7.**

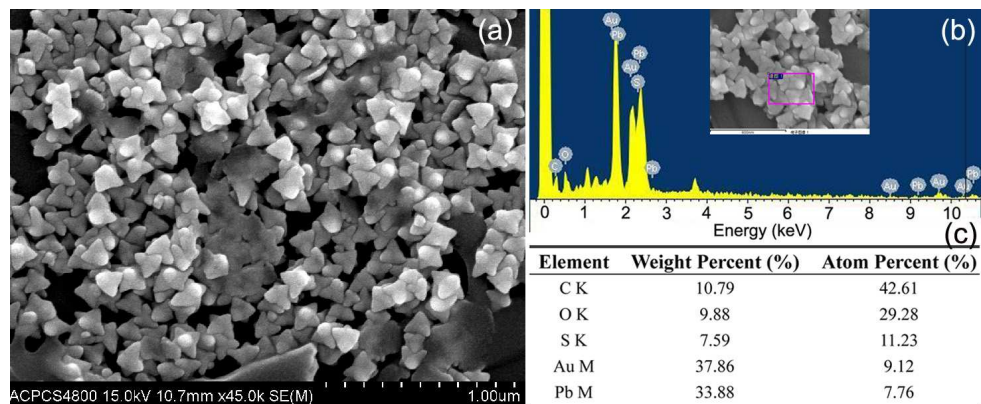

**FigureS7.** (a) Low-magnification SEM image of Sample D and (b) the corresponding EDS, (c) element analysis of Sample D obtained from the EDS result.

**Figure S8.**

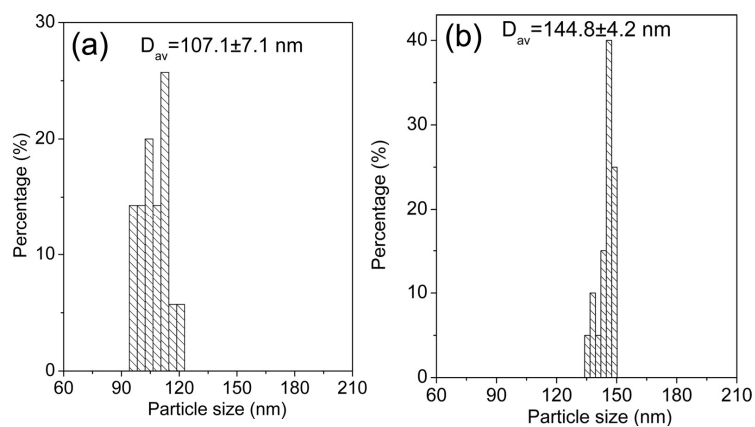

**Figure S8.** Size distribution histograms of (a) Sample E and (b) Sample D obtained at 30 min.

**Figure S9.**

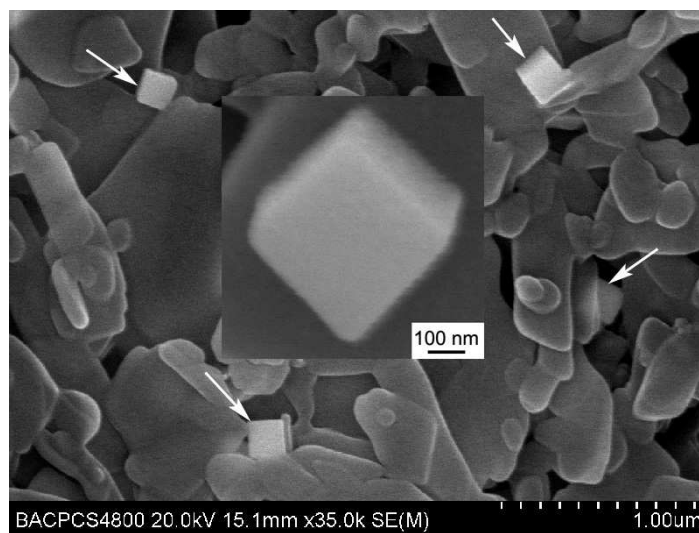

**Figure S9.** A typical SEM image of cubic PbS nanocrystals, and the inset shows a magnified SEM image.
